# Supplementary material for: Efficacy and Safety of Single-Pill Combination of Rosuvastatin and Ezetimibe in Chinese Patients with Primary Hypercholesterolemia Inadequately Controlled by Statin Treatment (ROZEL): A Randomized, Double-Blind, Double Dummy, Active-Controlled Phase 3 Clinical Trial
Source: PubMed Central journal article supplement — Adv Ther. 2023 Sep 28;40(12):5285–99. doi: 10.1007/s12325-023-02666-z (PMC10611639; doi:10.1007/s12325-023-02666-z), 2023-09-28
Supplement: 12325_2023_2666_MOESM1_ESM.pdf [file 12325_2023_2666_MOESM1_ESM.pdf]

**Efficacy and Safety of Single-pill Combination of Rosuvastatin and Ezetimibe in Chinese Patients with Primary Hypercholesterolemia Inadequately Controlled by Statin Treatment (ROZEL): A Randomized, Double-blind, Double dummy, Active-controlled Phase 3 Clinical Trial**

Qiaoli Su<sup>1</sup>, Ying Liu<sup>2</sup>, Guogang Zhang<sup>3</sup>, Li Xu<sup>4</sup>, Min Wang<sup>5</sup>, Shifang Mei<sup>5</sup>, Genevieve Garon<sup>6</sup>, Yanzhen Wu<sup>7</sup>, Qiang Lv<sup>8\*</sup>, Changsheng Ma<sup>8</sup>

1. Department of Cardiology, West China Hospital of Sichuan University, Chengdu, China
2. Department of Cardiology, The People's Hospital of Liaoning Province, Shengyang, China
3. Department of Cardiology, The Third Xiangya Hospital of Central South University, Changsha, China
4. Department of Cardiology, Pu Ren Hospital of Wu Han City, Wuhan, China
5. Sanofi Medical, Beijing, China
6. Sanofi Global Medical, Toronto, Canada
7. Sanofi Research and Development, Beijing, China
8. Department of Cardiology, Beijing Anzhen Hospital, Capital Medical University, Beijing, China

\*Corresponding author: Qiang Lv. Email: lvqiangmx@126.com. Anzhen Hospital, NO.2 Anzhen road, District Chaoyang 100029 Beijing, China

## Supplementary materials

**Supplementary Table S1.** Full list of Ethical approvals

| <b>Names of the ethics committee</b>                                                           | <b>Approval number</b> |
|------------------------------------------------------------------------------------------------|------------------------|
| Clinical Study Ethics Committee of Anzhen Hospital (Master)                                    | 2020-15                |
| Medical Ethics Committee of Tianjin People's Hospital                                          | 2020-18                |
| Ethics Committee of Affiliated Hospital of Xuzhou Medical University                           | XYFY2020-YL099-01      |
| Affiliated Hospital of Guangdong Medical University Institutional Review Board Ethic Committee | PJ2020-055             |
| Drug Clinical Trial Ethics Committee of Inner Mongolia Autonomous Region People's Hospital     | YWLCSYLL-2020-022-01   |
| Ethics Committee of Affiliated Hospital of Inner Mongolia Medical University                   | NO.SY (2020057)        |
| Drug Clinical Trial Ethics Committee of The Third People's Hospital of Hubei Province          | HBSDSRMYY-2020-A004-01 |
| Drug/Device Clinical Trial Ethics Committee of Siping Central People's Hospital                | 2020-Y-013-01          |
| Clinical Trial Ethics Committee of Affiliated Hospital of Jiangsu University                   | 2020-28                |
| Drug Clinical Trial Ethics Committee of Jilin City Central Hospital                            | PJ-202004              |
| Ethics Committee of Dalian Municipal Central Hospital                                          | 2020-050-01            |
| Drug Clinical Trial Ethics Committee of Yueyang Central Hospital                               | 2020-011               |
| Medical Ethics Committee of Central Hospital Affiliated To Shandong First Medical University   | 2020-107-02            |
| Medical Ethics Committee of Beijing Pinggu Hospital                                            | 2020-011-01            |
| Medical Ethics Committee of the First Affiliated Hospital of Xi'an Jiaotong University         | 2020-117               |
| Medical Ethics Committee of the Second Affiliated Hospital of Bengbu Medical College           | 2020-08                |
| Drug Clinical Trial Ethics Committee of East Hospital Affiliated To Tongji University          | 2020-068               |
| Ethics Committee of Hainan General Hospital                                                    | 2020-179               |
| Clinical Trial Ethics Committee of Baotou Central Hospital                                     | 2020-YW-13             |
| Ethics Committee of People's Hospital of Liaoning Province                                     | 2020-HS008             |
| Clinical Trial Ethics Committee of Wuhan Puren Hospital                                        | 2020-004               |
| Drug Clinical Trial Ethics Committee of Zibo Central Hospital                                  | 2020-013               |
| Clinical Trial Ethics Committee of West China Hospital, Sichuan University                     | 2020-71                |
| Drug/Medical Device Clinical Trial Ethics Committee of Jilin Provincial People's Hospital      | 2020-Y-016-1           |

|                                                                                                                        |                     |
|------------------------------------------------------------------------------------------------------------------------|---------------------|
| Ethics Committee of Union Hospital Affiliated to Tongji Medical College, Huazhong University of Science and Technology | 2020-0324           |
| Ethics Committee of the Third Xiangya Hospital, Central South University                                               | 20221               |
| Ethics Committee of Tianjin Fourth Central Hospital                                                                    | SZXLL-2020-H008     |
| Clinical Trial Ethics Committee of the Second People's Hospital of Nanning                                             | 2020016             |
| Clinical Trial Ethics Committee of Yanbian University Affiliated Hospital                                              | 2020-010-01         |
| Ethics Committee of Chongqing People's Hospital                                                                        | S 2020-017-01       |
| Clinical Trial Ethics Committee of Lishui People's Hospital                                                            | 2020-010-01         |
| Clinical Trial Ethics Committee of Yuncheng Central Hospital of Shanxi Province                                        | 2020-YW-030         |
| Clinical Trial Ethics Committee of Drug Clinical Trials, Zhuzhou Central Hospital                                      | ZZCHGCPEC2020015-01 |
| Ethics Committee of Drug/Medical Device Clinical Trials, General Hospital of Ningxia Medical University                | 2020-YW-127         |
| Ethics Committee of North Jiangsu People's Hospital                                                                    | 2020041             |
| Ethics Committee of the Second Affiliated Hospital of Nanjing Medical University                                       | 2020-YW-025-LP-01   |
| Ethics Committee of China-Japan Friendship Hospital, Jilin University                                                  | 2020-2020092301     |
| Ethics Committee of Beijing Friendship Hospital affiliated to Capital Medical University                               | 2020-P1-046-01      |
| Ethics Committee of Shaanxi Provincial People's Hospital                                                               | 2020-Y011           |
| Ethics Committee of Liuzhou People's Hospital                                                                          | 2020-020-01         |

**Supplementary Table S2.** Full list of exclusion criteria

---

**Exclusion criteria**

---

- 1) with homozygous familial hypercholesterolemia (FH)
  - 2) received low-density lipoprotein cholesterol (LDL-C) plasmapheresis in the 2 months prior to the screening visit or planned to receive LDL-C apheresis
  - 3) recently diagnosed (within 3 months prior to the screening visit) myocardial infarction(MI), unstable angina, myocardial revascularization (percutaneous coronary intervention[PCI], coronary artery bypass graft surgery [CABG]), transient ischemic attack (TIA), or stroke, carotid revascularization, endovascular procedure or surgical intervention for peripheral vascular disease.
  - 4) planned to undergo scheduled PCI, CABG, carotid or peripheral revascularization during the study period
  - 5) systolic blood pressure (SBP) >160 mmHg or diastolic blood pressure (DBP) >100 mmHg at study entry
  - 6) history of congestive heart failure New York Heart Association (NYHA) class IIIb or IV within 12 months
  - 7) any clinically relevant endocrine disease affecting blood lipids
  - 8) uncontrolled or newly diagnosed diabetes mellitus at study entry [fasting blood glucose (FBG) >180 mg/dL or glycated hemoglobin (HbA1c) >9%]
  - 9) history of cancer within 5 years, except treated basal cell or squamous cell skin cancer or in situ cervical cancer
  - 10) any patient deemed unfit for participation by the investigators
  - 11) known hypersensitivity reaction to statins or ezetimibe
  - 12) current myopathy
  - 13) history of statin-induced myopathy or rhabdomyolysis
  - 14) current active liver disease
  - 15) any contraindications to statins
  - 16) not previously instructed on lipid-lowering drugs prior to the screening visit
-

- 
- 17) systemic corticosteroids (unless used for adrenal/pituitary replacement therapy and with a stable dose for  $\geq 6$  weeks)
  - 18) hormonal therapy or oral contraceptives, unless stable for  $\geq 6$  weeks
  - 19) cyclosporine use
  - 20) human immunodeficiency virus (HIV)-positive treated with protease inhibitors
  - 21) received any investigational drugs within 1 month or five half-lives
  - 22) fasting triglycerides (TG)  $>400$  mg/dL, positive pregnancy test, serum Creatine Kinase (CK)  $>3$  times the upper limit of normal value (ULN), hypo- or hyperthyroidism, estimated glomerular filtration rate  $<30$  mL/min/1.73 m<sup>2</sup>, or alanine aminotransferase (ALT) or aspartate aminotransferase (AST)  $>3$  times the ULN
  - 23) any patient institutionalized or imprisoned
  - 24) impossible to randomize due to technical difficulties (e.g., homeless)
  - 25) alcohol abuse
  - 26) dependent on the sponsor or investigator
  - 27) employees of the study site
  - 28) any ethical conflict
  - 29) sensitivity to any of the study interventions
-

### Supplementary Material S3. Study design and visit windows of primary analysis

The baseline was the last available measured low-density lipoprotein cholesterol (LDL-C) value obtained up to randomization. The measured LDL-C at Week 4 and Week 8 was the LDL-C level obtained within the corresponding analysis window. The Week 4 analysis window was from Day 22 to Day 42 and Week 8 analysis window was from Day 43 to Day 70, with Day 1 as the day of randomization for participant during the double-blind period.

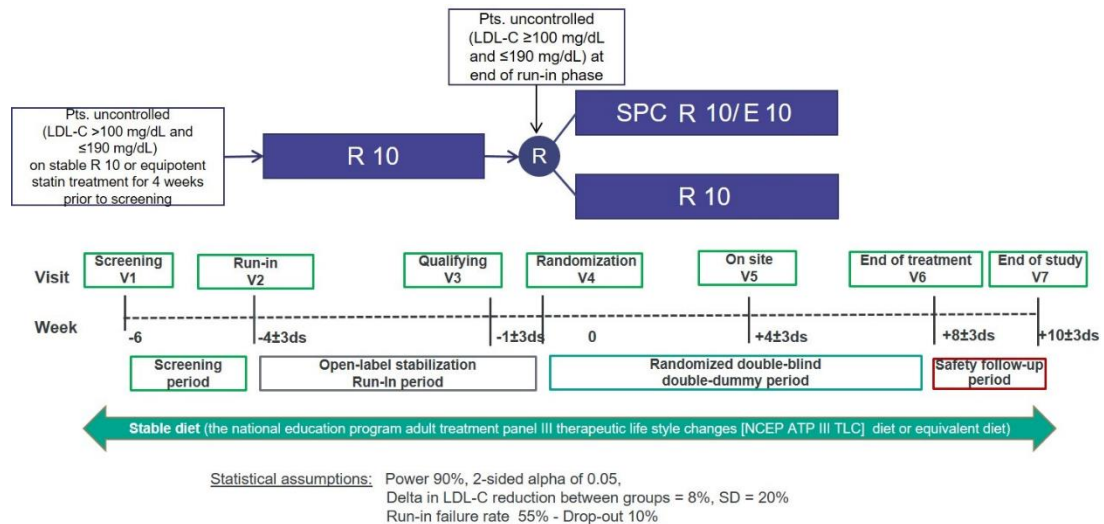

SPC: single-pill combination, R10: rosuvastatin 10 mg, E10: ezetimibe 10 mg

**Supplementary Table S4. Participant disposition - Randomized population**

| n (%)                                                          | R10/E10<br>(N=153) | R10<br>(N=152) |
|----------------------------------------------------------------|--------------------|----------------|
| Randomized and not exposed                                     | 1 (0.7)            | 0              |
| Randomized and exposed                                         | 152 (99.3)         | 152 (100)      |
| Completed the double-blind treatment period                    | 146 (95.4)         | 143 (94.1)     |
| Did not complete the double-blind treatment period             | 6 (3.9)            | 9 (5.9)        |
| Reason for permanent double-blind intervention discontinuation |                    |                |
| Adverse event                                                  | 2 (1.3)            | 1 (0.7)        |
| Related to COVID19                                             | 0                  | 0              |
| Not related to COVID19                                         | 2 (1.3)            | 1 (0.7)        |
| Lack of efficacy                                               | 0                  | 0              |
| Poor compliance to protocol                                    | 0                  | 2 (1.3)        |
| Progressive disease                                            | 0                  | 0              |
| Withdrawal by subject                                          | 4 (2.6)            | 6 (3.9)        |
| Other <sup>Error! Reference source not found.</sup>            | 0                  | 0              |
| Reason for double-blind intervention withdrawal by subject     |                    |                |
| Adverse event                                                  | 0                  | 0              |
| Study procedure                                                | 0                  | 0              |
| Other <sup>Error! Reference source not found.</sup>            | 4 (2.6)            | 6 (3.9)        |
| Related to COVID19                                             | 0                  | 0              |
| Not related to COVID19                                         | 4 (2.6)            | 6 (3.9)        |
| Completed the study period                                     | 144 (94.1)         | 143 (94.1)     |
| Did not complete the study period                              | 9 (5.9)            | 9 (5.9)        |
| Reason for study discontinuation                               |                    |                |
| Adverse event                                                  | 2 (1.3)            | 1 (0.7)        |
| Poor compliance to protocol                                    | 0                  | 1 (0.7)        |

| n (%)                                           | R10/E10<br>(N=153) | R10<br>(N=152) |
|-------------------------------------------------|--------------------|----------------|
| Site terminated by sponsor                      | 0                  | 0              |
| Study terminated by sponsor                     | 0                  | 0              |
| Withdrawal by subject                           | 7 (4.6)            | 7 (4.6)        |
| Other <i>Error! Reference source not found.</i> | 0                  | 0              |
| Status at last contact                          |                    |                |
| Alive                                           | 152 (99.3)         | 152 (100)      |
| Dead                                            | 1 (0.7)            | 0              |

COVID19: Corona Virus Disease 2019

a: Verbatim terms for these discontinuations are provided in the listing of participants with permanent double-blind intervention/study discontinuation.

Percentages are calculated using the number of participants randomized as denominator



**Supplementary Table S5.** Analysis populations

| <b>n (%)</b>                                                 | <b>R10/E10</b> | <b>R10</b> | <b>All</b> |
|--------------------------------------------------------------|----------------|------------|------------|
| Run-in population                                            | NA             | NA         | 512        |
| Run-in safety population                                     | NA             | NA         | 506        |
| Randomized population                                        | 153 (100)      | 152 (100)  | 305 (100)  |
| Modified Intent-to-Treat (mITT) population                   | 148 (96.7)     | 144 (94.7) | 292 (95.7) |
| Population without trial impact (disruption) due to COVID-19 | 148 (96.7)     | 142 (93.4) | 290 (95.1) |
| Double-blind safety population                               | 152            | 152        | 304        |

NA: Not applicable, R10: rosuvastatin 10 mg, E10: ezetimibe 10 mg, COVID19: Corona Virus Disease 2019

Note: For the double-blind safety population, participants are tabulated according to study intervention actually received (as treated)

For run-in population and run-in safety population, participants are tabulated according to all intervention group

For the other populations, participants are tabulated according to the study intervention allocated by randomization

**Supplementary Table S6.** Demographic and participant characteristics at baseline -  
Randomized population

|                             | SPC R10/E10<br>(N=153) | R10<br>(N=152) | All<br>(N=305) |
|-----------------------------|------------------------|----------------|----------------|
| <b>Age (years)</b>          |                        |                |                |
| Number                      | 153                    | 152            | 305            |
| Mean (SD)                   | 54.6 (11.9)            | 55.6 (11.6)    | 55.1 (11.8)    |
| Median                      | 57.0                   | 57.0           | 57.0           |
| Min ; Max                   | 28 ; 74                | 25 ; 80        | 25 ; 80        |
| <b>Age group [n (%)]</b>    |                        |                |                |
| Number                      | 153                    | 152            | 305            |
| From 18-64 years            | 114 (74.5)             | 112 (73.7)     | 226 (74.1)     |
| 65-74 years                 | 39 (25.5)              | 34 (22.4)      | 73 (23.9)      |
| 75 years and over           | 0                      | 6 (3.9)        | 6 (2.0)        |
| <b>Sex [n (%)]</b>          |                        |                |                |
| Number                      | 153                    | 152            | 305            |
| Male                        | 64 (41.8)              | 69 (45.4)      | 133 (43.6)     |
| Female                      | 89 (58.2)              | 83 (54.6)      | 172 (56.4)     |
| <b>Race [n (%)]</b>         |                        |                |                |
| Number                      | 153                    | 152            | 305            |
| Asian                       | 153 (100)              | 152 (100)      | 305 (100)      |
| <b>Ethnicity [n (%)]</b>    |                        |                |                |
| Number                      | 153                    | 152            | 305            |
| Not Hispanic or Latino      | 153 (100)              | 152 (100)      | 305 (100)      |
| <b>Baseline Weight (kg)</b> |                        |                |                |
| Number                      | 153                    | 152            | 305            |
| Mean (SD)                   | 67.4 (12.1)            | 67.3 (12.3)    | 67.4 (12.2)    |
| Median                      | 68.0                   | 65.8           | 67.0           |
| Min ; Max                   | 40 ; 108               | 36 ; 114       | 36 ; 114       |

|                                                            | SPC R10/E10<br>(N=153) | R10<br>(N=152) | All<br>(N=305) |
|------------------------------------------------------------|------------------------|----------------|----------------|
| <b>Baseline Weight by category (kg) [n (%)]</b>            |                        |                |                |
| Number                                                     | 153                    | 152            | 305            |
| <50                                                        | 9 (5.9)                | 7 (4.6)        | 16 (5.2)       |
| 50 to <100                                                 | 142 (92.8)             | 143 (94.1)     | 285 (93.4)     |
| ≥100                                                       | 2 (1.3)                | 2 (1.3)        | 4 (1.3)        |
| <b>Baseline BMI (kg/m<sup>2</sup>)</b>                     |                        |                |                |
| Number                                                     | 153                    | 152            | 305            |
| Mean (SD)                                                  | 25.169 (3.235)         | 25.051 (3.402) | 25.110 (3.314) |
| Median                                                     | 25.060                 | 25.085         | 25.080         |
| Min ; Max                                                  | 18.11 ; 37.64          | 14.12 ; 36.74  | 14.12 ; 37.64  |
| <b>Baseline BMI by category (kg/m<sup>2</sup>) [n (%)]</b> |                        |                |                |
| Number                                                     | 153                    | 152            | 305            |
| <18.5                                                      | 1 (0.7)                | 2 (1.3)        | 3 (1.0)        |
| 18.5 to <25                                                | 73 (47.7)              | 70 (46.1)      | 143 (46.9)     |
| 25 to <30                                                  | 68 (44.4)              | 72 (47.4)      | 140 (45.9)     |
| 30 to <35                                                  | 10 (6.5)               | 5 (3.3)        | 15 (4.9)       |
| ≥35                                                        | 1 (0.7)                | 3 (2.0)        | 4 (1.3)        |

SPC: single-pill combination, R10: rosuvastatin 10 mg, E10: ezetimibe 10 mg, BMI: body mass index, SD: Standard Deviation

The baseline values are defined as the values collected at the screening visit

**Supplementary Table S7.** Disease and therapy characteristics at baseline -  
Randomized population

|                                                                                                        | SPC R10/E10<br>(N=153) | R10<br>(N=152) | All<br>(N=305) |
|--------------------------------------------------------------------------------------------------------|------------------------|----------------|----------------|
| Duration of hypercholesterolemia<br>(years)                                                            |                        |                |                |
| Number                                                                                                 | 153                    | 152            | 305            |
| Mean (SD)                                                                                              | 3.40 (4.25)            | 3.66 (4.48)    | 3.53 (4.36)    |
| Median                                                                                                 | 1.72                   | 2.12           | 2.08           |
| Min ; Max                                                                                              | 0.1 ; 22.7             | 0.0 ; 23.1     | 0.0 ; 23.1     |
| Age of onset of<br>hypercholesterolemia (years)                                                        |                        |                |                |
| Number                                                                                                 | 153                    | 152            | 305            |
| Mean (SD)                                                                                              | 51.9 (11.7)            | 52.5 (11.0)    | 52.2 (11.3)    |
| Median                                                                                                 | 55.0                   | 54.0           | 54.0           |
| Min ; Max                                                                                              | 25 ; 73                | 24 ; 73        | 24 ; 73        |
| Myocardial revascularization [n<br>(%)]                                                                |                        |                |                |
| Number                                                                                                 | 153                    | 152            | 305            |
| Yes                                                                                                    | 14 (9.2)               | 20 (13.2)      | 34 (11.1)      |
| No                                                                                                     | 139 (90.8)             | 132 (86.8)     | 271 (88.9)     |
| Number of previous statins or<br>Xuezhikang treatments within two<br>months prior to screening [n (%)] |                        |                |                |
| Number                                                                                                 | 153                    | 152            | 305            |
| 1                                                                                                      | 149 (97.4)             | 148 (97.4)     | 297 (97.4)     |
| 2                                                                                                      | 4 (2.6)                | 4 (2.6)        | 8 (2.6)        |

|                                                                            | SPC R10/E10<br>(N=153) | R10<br>(N=152) | All<br>(N=305) |
|----------------------------------------------------------------------------|------------------------|----------------|----------------|
| Duration of last statin or Xuezhikang treatment prior to screening (years) |                        |                |                |
| Number                                                                     | 153                    | 152            | 305            |
| Mean (SD)                                                                  | 1.30 (2.61)            | 1.25 (2.28)    | 1.28 (2.45)    |
| Median                                                                     | 0.31                   | 0.28           | 0.30           |
| Min ; Max                                                                  | 0.1 ; 20.9             | 0.1 ; 13.3     | 0.1 ; 20.9     |
| Last statin or Xuezhikang treatment prior to screening                     |                        |                |                |
| Number                                                                     | 153                    | 152            | 305            |
| Rosuvastatin 10 mg or equipotent statins                                   | 153 (100)              | 152 (100)      | 305 (100)      |
| Rosuvastatin 10 mg                                                         | 80 (52.3)              | 73 (48.0)      | 153 (50.2)     |
| Atorvastatin 20 mg                                                         | 65 (42.5)              | 73 (48.0)      | 138 (45.2)     |
| Fluvastatin 80 mg                                                          | 1 (0.7)                | 1 (0.7)        | 2 (0.7)        |
| Pitavastatin 4 mg                                                          | 0                      | 2 (1.3)        | 2 (0.7)        |
| Pravastatin 40 mg                                                          | 5 (3.3)                | 3 (2.0)        | 8 (2.6)        |
| Simvastatin 40 mg                                                          | 1 (0.7)                | 0              | 1 (0.3)        |
| Xuezhikang 1.2 g                                                           | 1 (0.7)                | 0              | 1 (0.3)        |

SPC: single-pill combination, R10: rosuvastatin 10 mg, E10: ezetimibe 10 mg, SD: Standard Deviation

**Supplementary Table S8.** Percent change in LDL-C from baseline to Week 4 and Week 8 using MMRM - mITT population

| LDL-C                                      | SPC R10/E10<br>(N=148) | R10<br>(N=144)    |
|--------------------------------------------|------------------------|-------------------|
| Double-blind baseline (mmol/L)             |                        |                   |
| Number                                     | 148                    | 144               |
| Mean (SD)                                  | 3.261 (0.724)          | 3.377 (0.713)     |
| Median                                     | 3.235                  | 3.300             |
| Min ; Max                                  | 1.87 : 5.61            | 1.59 : 5.24       |
| Week 4                                     |                        |                   |
| Percent change from baseline to Week 4 (%) |                        |                   |
| LS Mean (SE)                               | -22.90 (2.01)          | -8.50 (2.04)      |
| 95% CI                                     | (-26.86 to -18.94)     | (-12.51 to -4.49) |
| LS Mean difference (SE) vs. R10            | -14.40 (2.87)          |                   |
| 95% CI                                     | (-20.04 to -8.75)      |                   |
| p-value                                    | <0.0001*               |                   |
| Week 8                                     |                        |                   |
| Percent change from baseline to Week 8 (%) |                        |                   |
| LS Mean (SE)                               | -21.98 (2.22)          | -8.12 (2.29)      |
| 95% CI                                     | (-26.35 to -17.60)     | (-12.63 to 3.61)  |
| LS Mean difference (SE) vs. R10            | -13.85 (3.20)          |                   |
| 95% CI                                     | (-20.15 to -7.56)      |                   |
| p-value                                    | <0.0001*               |                   |

LDL-C: low-density lipoprotein cholesterol, SPC: single-pill combination, R10: rosuvastatin 10 mg, E10: ezetimibe 10 mg, LS: least square, MMRM: mixed-effect model with repeated measures, SD: Standard Deviation

| LDL-C | SPC R10/E10<br>(N=148) | R10<br>(N=144) |
|-------|------------------------|----------------|
|-------|------------------------|----------------|

Note: Least-squares (LS) Mean, standard error (SE), and the p-value is taken from the MMRM analysis. The model includes the fixed categorical effects of the intervention group, time point, intervention group-by-time point, and the continuous fixed covariates of baseline LDL-C value and baseline value-by-time point interaction.

MMRM model and baseline description run on participants with a baseline value and a post-baseline value in at least one of the analysis windows used in the model. The p-value is followed by a ‘\*’ if statistically significant according to the fixed hierarchical approach used to ensure a strong control of the overall type-I error rate at the 0.05 level.

**Supplementary Table S9.** Hierarchical testing strategy and results

| <b>Endpoint</b>                                                    | <b>Results</b>                                                   | <b>P-value</b> |
|--------------------------------------------------------------------|------------------------------------------------------------------|----------------|
| The proportion of participants reaching the LDL-C target at week 8 | Estimate for odds-ratio vs. R10 of 2.80                          | <0.0001*       |
| Percent change in LDL-C from baseline to week 4                    | LS mean difference vs. R10 of -14.40%                            | <0.0001*       |
| Percent change in TC from baseline to week 8                       | LS mean difference vs. R10 of -9.77%                             | <0.0001*       |
| Percent change in TC from baseline to week 4                       | LS mean difference vs. R10 of -10.22%                            | <0.0001*       |
| Percent change in TG from baseline to week 8                       | Combined estimate for adjusted mean difference vs. R10 of -7.02% | 0.0488*        |
| Percent change in TG from baseline to week 4                       | Combined estimate for adjusted mean difference vs. R10 of -5.21% | 0.1420         |
| Percent change in HDL-C from baseline to week 8                    | LS mean difference vs. R10 of 2.63%                              | 0.1131         |
| Percent change in HDL-C from baseline to week 4                    | LS mean difference vs. R10 of 2.17%                              | 0.1978         |

LDL-C, low-density lipoprotein cholesterol; TC, total cholesterol; TG, triglyceride; HDL-C, high-density lipoprotein cholesterol; LS mean, Least-squares mean.

The p-value is followed by a ‘\*’ if statistically significant according to the fixed hierarchical approach used to ensure a strong control of the overall type-I error rate at the 0.05 level



### **Supplementary Material S10. Adverse events of special interest (AESIs)**

An adverse event (AE) of special interest (AESI) is an AE (serious or nonserious) of scientific and medical concern specific to the Sponsor's product or program, for which ongoing monitoring and immediate notification by the Investigator to the Sponsor is required. Such events may require further investigation in order to characterize and understand them. Adverse events of special interest may be added, modified or removed during a study by protocol amendment.

- Alaninetransaminase (ALT)  $>3 \times$  upper limit of normal value (ULN)
- Increase in Creatine Kinase (CK)  $>3 \times$  ULN.
- Pregnancy of a female subject entered in a study as well as pregnancy occurring in a female partner of a male subject entered in a study with investigational medicinal Product (IMP).
  - i. It will be qualified as an SAE only if it fulfills one of the seriousness criteria
  - ii. In the event of pregnancy in a female participant, IMP should be discontinued. If the pregnancy occurred in a female partner of a male subject included in the study it is not necessary to discontinue the IMP.
- Symptomatic overdose (serious or nonserious) with IMP.
  - i. An overdose (accidental or intentional) with the IMP is an event suspected by the Investigator or spontaneously notified by the participant (not based on systematic pills count) and defined as at least twice the intended dose within the intended therapeutic interval, adjusted according to the tested drug. The patient should be monitored, and appropriate symptomatic treatment should be instituted, as needed. It will be recorded in the eCRF at "overdose" page.
  - ii. The circumstances of the overdose (i.e., accidental or intentional) should be clearly specified in the verbatim, and the symptoms, if any, entered on separate AE/SAE (serious AE) forms.
